# Supplementary material
Source: MDPI journal article supplement (https://www.mdpi.com/2071-1050/11/20/5863)
Supplement: s1 [file s1]

Table A3 The unbiased genetic distance (D) and geographic distances (km) of the seven populations.

| Pop ID | Pop1   | Pop2   | Pop3    | Pop4    | Pop5    | Pop6    | Pop7    |
|--------|--------|--------|---------|---------|---------|---------|---------|
| Pop1   | *      | 89.246 | 164.118 | 251.976 | 930.509 | 196.42  | 455.253 |
| Pop2   | 0.1493 | *      | 143.734 | 231.564 | 903.32  | 156.277 | 383.67  |
| Pop3   | 0.1925 | 0.2372 | *       | 90.184  | 1044.64 | 299.069 | 494.646 |
| Pop4   | 0.1413 | 0.2138 | 0.1105  | *       | 1126.08 | 384.427 | 556.362 |
| Pop5   | 0.2177 | 0.2433 | 0.2339  | 0.1912  | *       | 747.193 | 625.88  |
| Pop6   | 0.2617 | 0.2317 | 0.2621  | 0.2444  | 0.2426  | *       | 274.79  |
| Pop7   | 0.2386 | 0.2911 | 0.292   | 0.2335  | 0.2496  | 0.2545  | *       |

Notes: geographic distances (km) (above diagonal) and genetic distance (below diagonal).
