# Supplementary material
Source: MDPI journal article supplement (https://www.mdpi.com/2071-1050/11/20/5863)
Supplement: s1 [file s1]

Table A6 Analyses of the genetic diversity at the population level and species level with different markers in variance *Elymus* species. Markers of studies in each species, level of genetic variance and PPB values are given.

| Markers              | Species                  | PPB % | Hep    | Hes    | Shannon's index (I) | Collection site                                                 | Reference               |
|----------------------|--------------------------|-------|--------|--------|---------------------|-----------------------------------------------------------------|-------------------------|
| SRAP                 | <i>E. nutans</i>         | 85.86 | -      | 0.1981 | 0.3223              | Qinghai; Tibet; Sichuan; Gansu; Xinjiang                        | Miao et al. (2011)      |
|                      | <i>E. nutans</i>         | 85.39 | -      | -      | -                   | Qinghai; Tibet; Sichuan; Gansu; Xinjiang                        | Chen et al. (2009)      |
|                      | <i>E. sibiricus</i>      | 87    | 0.1092 | 0.2434 | 0.3732              | Sichuan, China                                                  | Yan et al. (2010)       |
| Allozyme             | <i>E. sibiricus</i>      | 71.4  | 0.0773 | 0.2528 | 0.3769              | Hebei, China; Gansu, China; Qinghai, China;                     | Yan et al. (2007)       |
|                      | <i>E. breviaristatus</i> | 57.1  | 0.06   | 0.172  | 0.267               | Gansu, China; Qinghai, China                                    | Yan et al. (2007)       |
|                      | <i>E. nutans</i>         | 71.4  | 0.091  | 0.233  | 0.3482              | Gansu, China; Qinghai, China                                    | Yan et al. (2007)       |
| Microsatellite (SSR) | <i>E. breviaristatus</i> | 83.42 | -      | -      | 0.2506              | Sichuan, China                                                  | Gu et al. (2015)        |
|                      | <i>E. sibiricus</i>      | 86.88 | 0.1296 | 0.2096 | 0.4123              | Sichuan, China                                                  | Yan et al. (2010)       |
| RAPD                 | <i>E. sibiricus</i>      | 78.65 | -      | 0.264  | 0.398               | Sichuan, China                                                  | Ma et al.(2012)         |
|                      | <i>E.trachycaulus</i>    | 69    | 0.23   | 0.22   | -                   | British Columbia, Canada                                        | Gatdett et al.(2005)    |
|                      | <i>E. nutans</i>         | 90.39 | -      | 0.1791 | 0.3009              | Qinghai; Tibet; Sichuan; Gansu; Xinjiang                        | Miao et al. (2011)      |
| ISSR                 | <i>E. sibiricus</i>      | 77.2  | 0.181  | 0.274  | 0.345               | Sichuan, China                                                  | Ma et al. (2008)        |
|                      | <i>E.nutans</i>          | 91.4  | -      | -      | -                   | Sichuan; Xinjiang; Qinghai; Gansu; Tibet                        | Chen et al.(2009)       |
|                      | <i>E.nutans</i>          | 100   | -      | 0.3438 | 0.516               | Qinghai-Tibetan Plateau, China                                  | Ma et al.(2014)         |
| AFLP                 | <i>E.dahuricus</i>       | 51.5  | -      | 0.2336 | 0.3387              | Siberia; Primorskiy region of the Russian Far East; Kirghizstan | T.sasanuma et al.(2001) |
|                      | <i>E.tangutorum</i>      | 27.14 | -      | 0.1228 | 0.1606              | Tibet, China                                                    | T.sasanuma et al.(2001) |
|                      | <i>E.excelsus</i>        | 69.35 | -      | 0.2838 | 0.4095              | Siberia; Primorskiy region of the Russian Far East              | T.sasanuma et al.(2001) |
|                      | <i>E. nutans</i>         | 50,7  | 0.298  | 0.429  | -                   | Qinghai, China                                                  | Yan et al.(2010)        |
