# Supplementary material
Source: MDPI journal article supplement (https://www.mdpi.com/2071-1050/11/20/5863)
Supplement: s1 [file s1]

Table A1 Primer sequences used for SRAP analysis.

| Forward primer (5'→3') |                   | Reverse primer (5'→3') |                    |
|------------------------|-------------------|------------------------|--------------------|
| Me2                    | TGAGTCCAAACCGGACA | Em3                    | GACTGCGTACGAATTACT |
| Me4                    | TGAGTCCAAACCGGAGA | Em5                    | GACTGCGTACGAATTATC |
| Me5                    | TAGGTCCAAACCGGATC | Em7                    | GACTGCGTACGAATTCCA |
| Me6                    | TAGGTCCAAACCGGCAC | Em8                    | GACTGCGTACGAATTCCG |
| Me7                    | TAGGTCCAAACCGGCCA | Em9                    | GACTGCGTACGAATTCCG |
| Me8                    | TAGGTCCAAACCGGCCG | Em11                   | GACTGCGTACGAATTCTT |
| Me9                    | TAGGTCCAAACCGGCGG | Em12                   | GACTGCGTACGAATTGAT |
| Me10                   | TAGGTCCAAACCGGCTC | Em14                   | GACTGCGTACGAATTGGT |
| Me11                   | TAGGTCCAAACCGGCTT | Em15                   | GACTGCGTACGAATTGTA |
|                        |                   | Em16                   | GACTGCGTACGAATTTAG |
|                        |                   | Em17                   | GACTGCGTACGAATTTAT |
|                        |                   | Em18                   | GACTGCGTACGAATTTCT |
|                        |                   | Em19                   | GACTGCGTACGAATTTCT |
|                        |                   | Em20                   | GACTGCGTACGAATTTTC |
