# Supplementary material
Source: MDPI journal article supplement (https://www.mdpi.com/2071-1050/11/20/5863)
Supplement: s1 [file s1]

Table A4 The Correlation coefficient between ecological geographical factors and genetic diversity

|          | H <sub>e</sub> | H <sub>o</sub> | H <sub>B</sub> | H <sub>j</sub> |
|----------|----------------|----------------|----------------|----------------|
| Altitude | 0.53897658     | 0.53434522     | 0.56616538     | 0.54882265     |
| AMT      | 0.07226444     | 0.07659782     | 0.0698009      | 0.06195789     |
| AMP      | -0.12988509    | -0.13124258    | -0.09525851    | -0.13852826    |

Table A5 The P-value of of the correlation coefficient between ecological geographical factors and genetic diversity

|          | H <sub>e</sub> | H <sub>o</sub> | H <sub>B</sub> | H <sub>j</sub> |
|----------|----------------|----------------|----------------|----------------|
| Altitude | 0.2119         | 0.2166         | 0.1852         | 0.2020         |
| AMT      | 0.8776         | 0.8703         | 0.8818         | 0.8950         |
| AMP      | 0.7814         | 0.7791         | 0.8390         | 0.7671         |
