# Supplementary material
Source: MDPI journal article supplement (https://www.mdpi.com/2071-1050/11/20/5863)
Supplement: s1 [file s1]

Table A2 Analysis of SRAP-PCR amplification results.

| Primer combinations | Total number of bands | No. PB <sup>a</sup> | PPB <sup>b</sup> (%) | PIC    |
|---------------------|-----------------------|---------------------|----------------------|--------|
| Me2-Em8             | 24                    | 24                  | 100                  | 0.3169 |
| Me2-Em9             | 20                    | 19                  | 95                   | 0.3117 |
| Me2-Em12            | 28                    | 26                  | 92.8571              | 0.2909 |
| Me2-Em18            | 23                    | 21                  | 91.3043              | 0.3253 |
| Me4-Em3             | 36                    | 32                  | 88.8889              | 0.2817 |
| Me4-Em5             | 26                    | 22                  | 84.6154              | 0.2420 |
| Me5-Em11            | 23                    | 23                  | 100                  | 0.3637 |
| Me5-Em17            | 24                    | 23                  | 95.8333              | 0.3528 |
| Me6-Em17            | 24                    | 22                  | 91.6667              | 0.2970 |
| Me7-Em14            | 22                    | 18                  | 81.8182              | 0.2837 |
| Me7-Em16            | 28                    | 27                  | 96.4286              | 0.2822 |
| Me8-Em15            | 25                    | 24                  | 96                   | 0.3344 |
| Me8-Em20            | 21                    | 19                  | 90.4762              | 0.3033 |
| Me9-Em5             | 22                    | 21                  | 95.4545              | 0.2668 |
| Me9-Em7             | 21                    | 18                  | 85.7143              | 0.3222 |
| Me10-Em11           | 24                    | 23                  | 95.8333              | 0.3018 |
| Me10-Em19           | 21                    | 19                  | 90.4762              | 0.2812 |
| Me11-Em17           | 25                    | 23                  | 92                   | 0.2562 |
| Me11-Em18           | 22                    | 20                  | 90.9091              | 0.2536 |
| Total               | 459                   | 424                 | 92.37                | -      |
| Mean                | 24.1579               | 22.3158             | -                    | 0.2983 |

<sup>a</sup> Number of polymorphic bands<sup>b</sup> Percentage of polymorphic bands
